# Supplementary material for: Piezoelectric and dielectric constants of topologically defected boron nitride nanotubes
Source: Royal Society of Chemistry journal article supplement (doi:10.1039/d3dt00678f), 2023-01-01
Supplement: d3dt00678f1.pdf [file d3dt00678f1.pdf]

# **Piezoelectric and Dielectric Constants of Topologically Defected Boron Nitride Nanotubes**

Seunghwa Yang<sup>1\*</sup>

*<sup>1</sup>Mechanical Engineering Division, School of Energy Systems Engineering  
Chung-Ang University, 84 Heukseok-Ro, Dongjak-Gu, Seoul 06974, South Korea*

## **Supporting Information**

---

\*Corresponding author. Tel: +82-2-820-5266  
E-mail address: [fafala@cau.ac.kr](mailto:fafala@cau.ac.kr) (S. Yang)

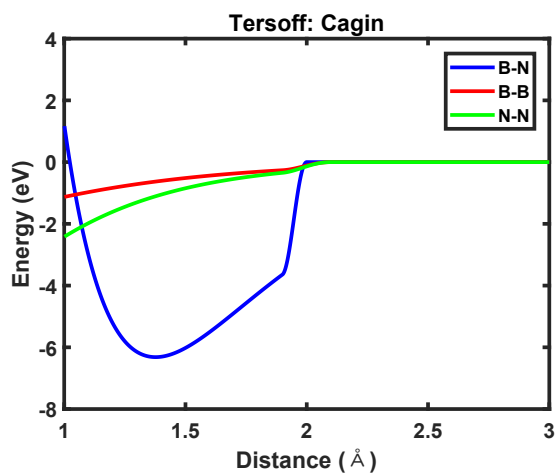

(a)

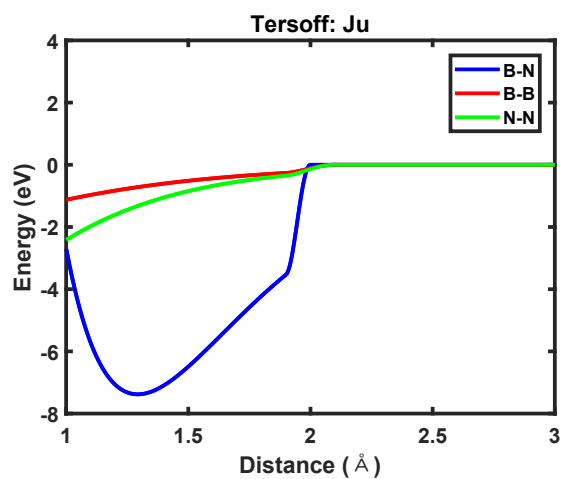

(b)

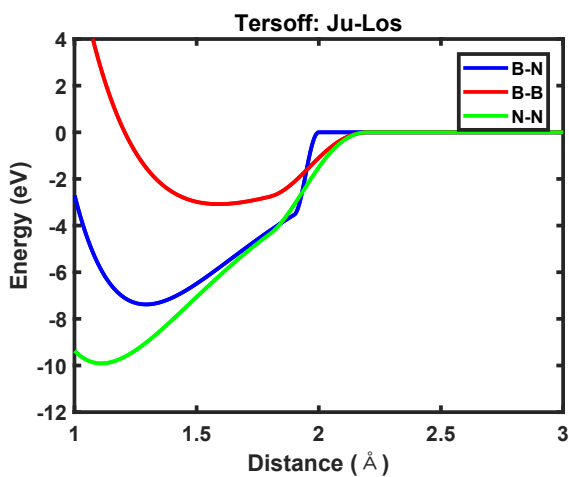

(c)

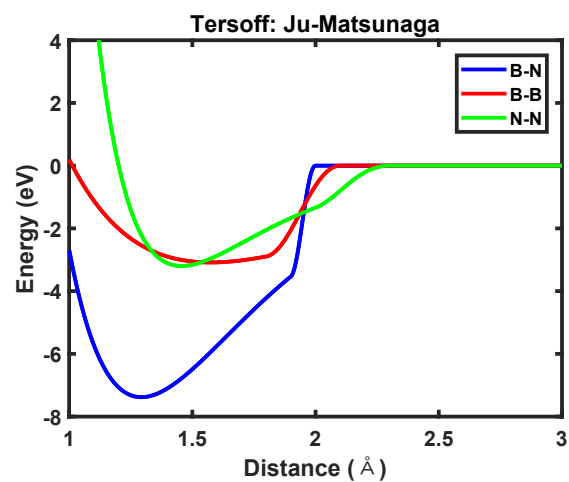

(d)

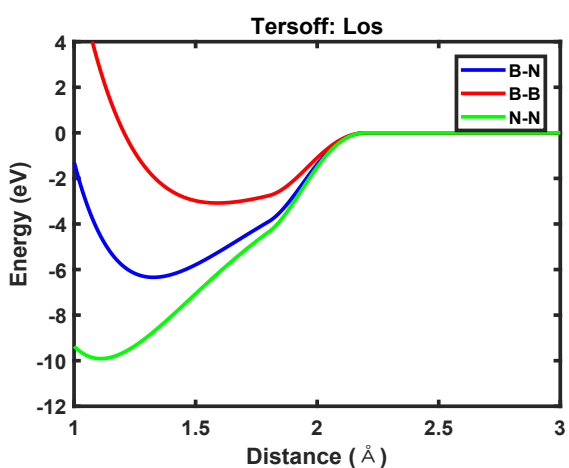

(e)

Figure S-1. Diatomic energy-interatomic distance relationship of Tersoff potential parameters (a) Cagin (b) Ju (c) Ju-Los (d) Ju-Matsunaga (e) Los.

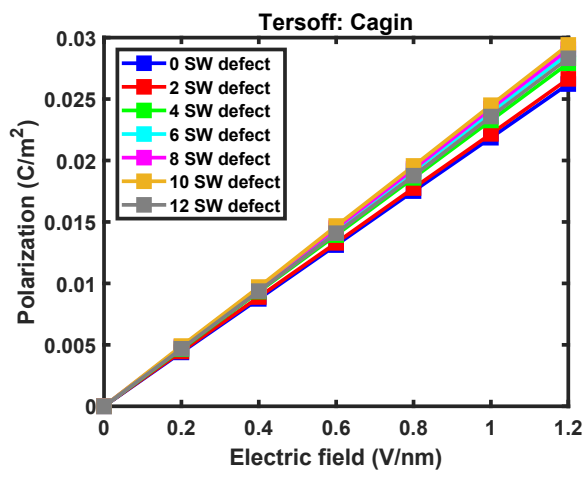

(a)

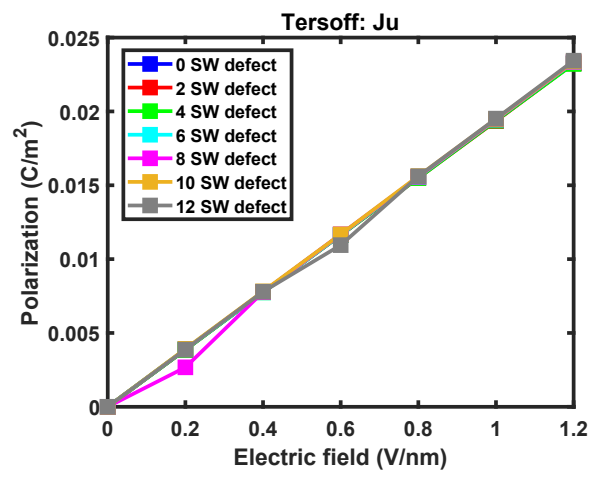

(b)

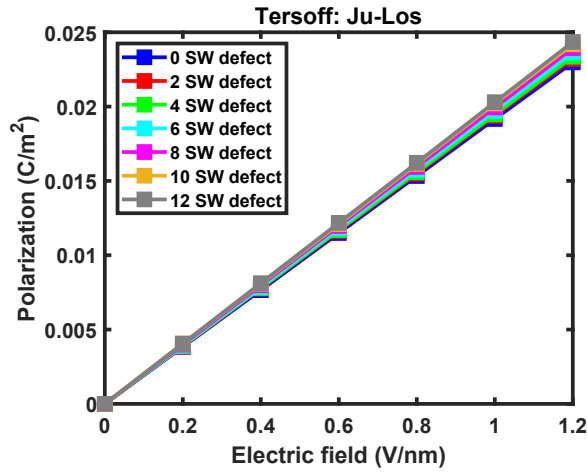

(c)

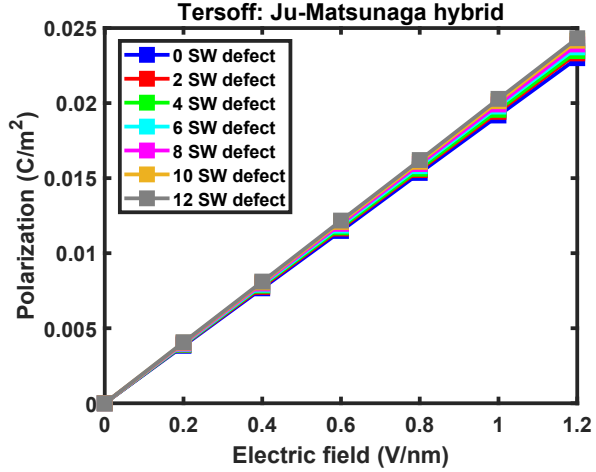

(d)

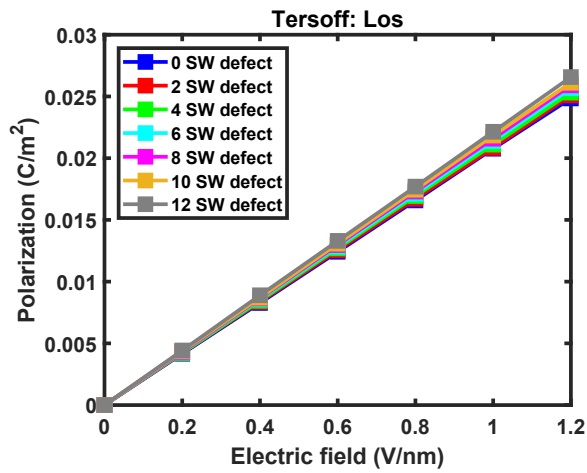

(e)

Figure S-2. Electric field-to-induced polarization relationship of BNNT according to SW defect under hollow cylinder assumption. (a) Cağın (b) Ju (c) Ju-Los (d) Ju-Matsunaga (e) Los.

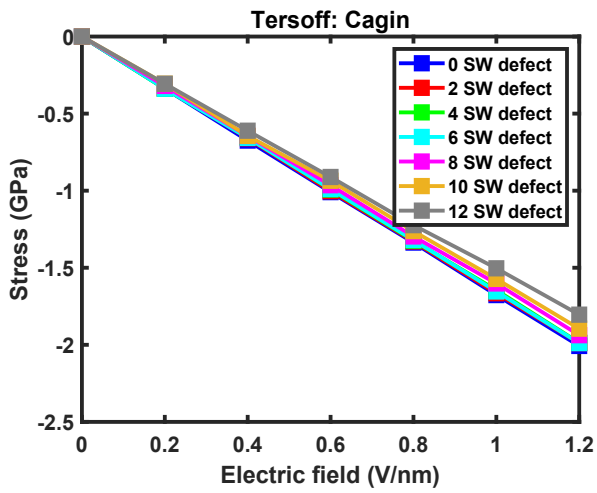

(a)

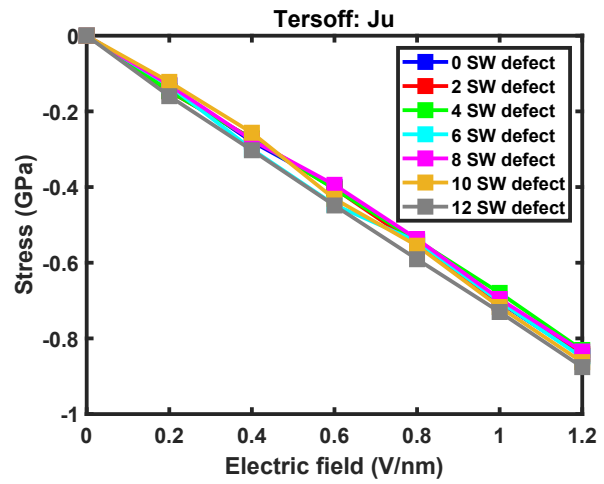

(b)

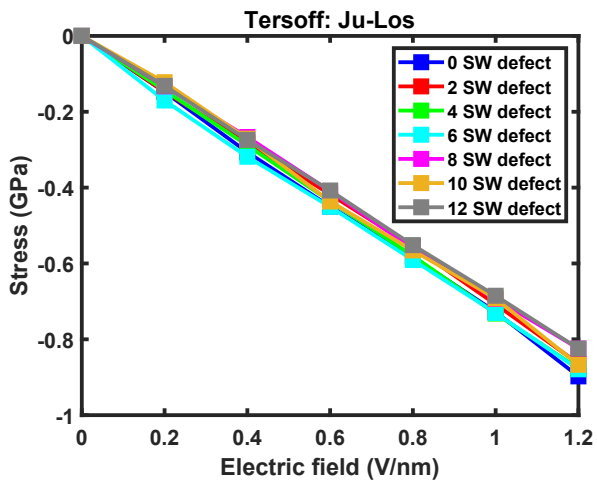

(c)

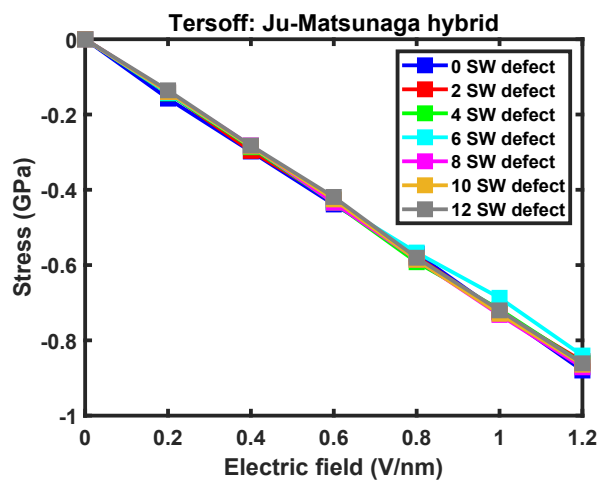

(d)

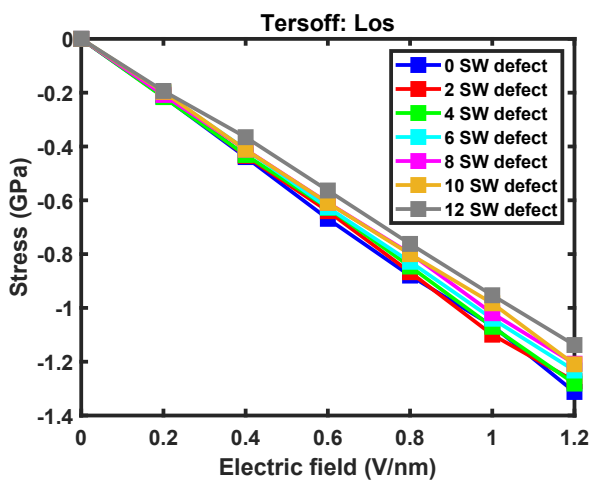

(e)

Figure S-3. Electric field-to-induced stress relationship of BNNT according to SW defect under hollow cylinder assumption. (a) Cağın (b) Ju (c) Ju-Los (d) Ju-Matsunaga (e) Los.

Table S-1. The Tersoff potential parameter for B-N, B-B, and N-N bond based on Çağın *et al.* [41]

| Parameters                   | B-N       | B-B      | N-N       |
|------------------------------|-----------|----------|-----------|
| $A(\text{eV})$               | 1380      | 40.05201 | 128.86866 |
| $B(\text{eV})$               | 340       | 43.1320  | 138.7786  |
| $\lambda_1(\text{\AA}^{-1})$ | 3.568     | 2.2372   | 2.82930   |
| $\lambda_2(\text{\AA}^{-1})$ | 2.199     | 2.07749  | 2.62727   |
| $\lambda_3(\text{\AA}^{-1})$ | 0         | 0        | 0         |
| $n$                          | 0.72751   | 3.992906 | 0.618443  |
| $\beta$                      | 1.2572e-7 | 1.6e-6   | 0.019251  |
| $c$                          | 25000     | 0.52629  | 17.7959   |
| $d$                          | 4.3484    | 0.001587 | 5.9484    |
| $h$                          | -0.89     | 0.5      | 0.0       |
| $R(\text{\AA})$              | 1.95      | 2.0      | 2.0       |
| $D(\text{\AA})$              | 0.05      | 0.1      | 0.1       |
| $m$                          | 3         | 3        | 3         |
| $\gamma$                     | 1         | 1        | 1         |

Table S-2. The Tersoff potential parameter for B-N, B-B, and N-N bond based on Ju *et al.* [40]

| Parameters                   | B-N       | B-B      | N-N       |
|------------------------------|-----------|----------|-----------|
| $A(\text{eV})$               | 4570.8    | 40.05201 | 128.86866 |
| $B(\text{eV})$               | 3732.38   | 43.1320  | 138.7786  |
| $\lambda_1(\text{\AA}^{-1})$ | 2.99038   | 2.2372   | 2.82930   |
| $\lambda_2(\text{\AA}^{-1})$ | 2.77618   | 2.07749  | 2.62727   |
| $\lambda_3(\text{\AA}^{-1})$ | 0         | 0        | 0         |
| $n$                          | 0.351653  | 3.992906 | 0.618443  |
| $\beta$                      | 1.1134e-5 | 1.6e-6   | 0.019251  |
| $c$                          | 1093.28   | 0.52629  | 17.7959   |
| $d$                          | 14.82145  | 0.001587 | 5.9484    |
| $h$                          | -0.6815   | 0.5      | 0.0       |
| $R(\text{\AA})$              | 1.95      | 2.0      | 2.0       |
| $D(\text{\AA})$              | 0.05      | 0.1      | 0.1       |
| $m$                          | 3         | 3        | 3         |
| $\gamma$                     | 1         | 1        | 1         |

Table S-3. The Tersoff potential parameter for B-N, B-B, and N-N bond based on Ju *et al.* [40] and Los *et al.* [42].

| Parameters                   | B-N       | B-B        | N-N       |
|------------------------------|-----------|------------|-----------|
| $A(\text{eV})$               | 4570.8    | 3376.3350  | 2978.9527 |
| $B(\text{eV})$               | 3732.38   | 2768.7363  | 2563.5603 |
| $\lambda_1(\text{\AA}^{-1})$ | 2.99038   | 2.68572    | 2.8293    |
| $\lambda_2(\text{\AA}^{-1})$ | 2.77618   | 2.52118    | 2.62727   |
| $\lambda_3(\text{\AA}^{-1})$ | 0         | 0          | 0         |
| $n$                          | 0.351653  | 1.142247   | 0.6650    |
| $\beta$                      | 1.1134e-5 | 0.01498959 | 0.019251  |
| $c$                          | 1093.28   | 26617.3    | 23.5      |
| $d$                          | 14.82145  | 141.2      | 3.750     |
| $h$                          | -0.6815   | -0.13      | -0.4      |
| $R(\text{\AA})$              | 1.95      | 2.0        | 2.0       |
| $D(\text{\AA})$              | 0.05      | 0.2        | 0.2       |
| $m$                          | 3         | 3          | 3         |
| $\gamma$                     | 1         | 1          | 1         |

Table S-4. The Tersoff potential parameter for B-N, B-B, and N-N bond based on Ju *et al.* [40] and Matsunaga *et al.* [39]

| Parameters                   | B-N       | B-B       | N-N     |
|------------------------------|-----------|-----------|---------|
| $A(\text{eV})$               | 4570.8    | 277.02    | 11000   |
| $B(\text{eV})$               | 3732.38   | 183.49    | 219.45  |
| $\lambda_1(\text{\AA}^{-1})$ | 2.99038   | 1.9922    | 5.7708  |
| $\lambda_2(\text{\AA}^{-1})$ | 2.77618   | 1.5856    | 2.5115  |
| $\lambda_3(\text{\AA}^{-1})$ | 0         | 0         | 0       |
| $n$                          | 0.351653  | 3.9929    | 12.4498 |
| $\beta$                      | 1.1134e-5 | 0.0000016 | 0.10562 |
| $c$                          | 1093.28   | 0.52629   | 79934   |
| $d$                          | 14.82145  | 0.001587  | 134.32  |
| $h$                          | -0.6815   | 0.5       | -0.9973 |
| $R(\text{\AA})$              | 1.95      | 1.95      | 2.15    |
| $D(\text{\AA})$              | 0.05      | 0.15      | 0.15    |
| $m$                          | 3         | 3         | 3       |
| $\gamma$                     | 1         | 1         | 1       |



Table S-5. The Tersoff potential parameter for B-N, B-B, and N-N bond based on Los *et al.* [42]

| Parameters                   | B-N         | B-B        | N-N       |
|------------------------------|-------------|------------|-----------|
| $A(\text{eV})$               | 3330.06     | 3376.3350  | 2978.9527 |
| $B(\text{eV})$               | 2595.6860   | 2768.7363  | 2563.5603 |
| $\lambda_1(\text{\AA}^{-1})$ | 2.95        | 2.68572    | 2.8293    |
| $\lambda_2(\text{\AA}^{-1})$ | 2.69335     | 2.52118    | 2.62727   |
| $\lambda_3(\text{\AA}^{-1})$ | 0           | 0          | 0         |
| $n$                          | 0.6576543   | 1.142247   | 0.6650    |
| $\beta$                      | 0.002702485 | 0.01498959 | 0.019251  |
| $c$                          | 306         | 26617.3    | 23.5      |
| $d$                          | 10          | 141.2      | 3.750     |
| $h$                          | -0.7218     | -0.13      | -0.4      |
| $R(\text{\AA})$              | 2.0         | 2.0        | 2.0       |
| $D(\text{\AA})$              | 0.2         | 0.2        | 0.2       |
| $m$                          | 3           | 3          | 3         |
| $\gamma$                     | 1           | 1          | 1         |

Table S-6. Relative dielectric constant of BNNTs determined from reverse piezoelectric simulation under hollow cylinder assumption

| # SW defect | Cağın | Ju   | Ju-Los | Ju-Matsunaga | Los  |
|-------------|-------|------|--------|--------------|------|
| 0           | 2.48  | 2.25 | 2.24   | 2.24         | 2.37 |
| 2           | 2.55  | 2.28 | 2.27   | 2.28         | 2.39 |
| 4           | 2.67  | 2.28 | 2.29   | 2.29         | 2.43 |
| 6           | 2.74  | 2.28 | 2.32   | 2.32         | 2.45 |
| 8           | 2.78  | 2.33 | 2.33   | 2.34         | 2.48 |
| 10          | 2.81  | 2.28 | 2.37   | 2.36         | 2.50 |
| 12          | 2.71  | 2.29 | 2.38   | 2.38         | 2.54 |

Table S-7. Piezoelectric constant of BNNTs determined from reverse piezoelectric simulation under hollow cylinder assumption [C/m<sup>2</sup>]

| # SW defect | Cağın | Ju   | Ju-Los | Ju-Matsunaga | Los  |
|-------------|-------|------|--------|--------------|------|
| 0           | 1.72  | 0.74 | 0.78   | 0.77         | 1.11 |
| 2           | 1.69  | 0.75 | 0.76   | 0.76         | 1.10 |
| 4           | 1.70  | 0.74 | 0.78   | 0.77         | 1.09 |
| 6           | 1.69  | 0.75 | 0.77   | 0.74         | 1.06 |
| 8           | 1.66  | 0.75 | 0.74   | 0.78         | 1.04 |
| 10          | 1.69  | 0.78 | 0.77   | 0.78         | 1.03 |
| 12          | 1.55  | 0.77 | 0.74   | 0.77         | 0.98 |

Table S-8. Displacement of b-B, b-N atoms and the change of  $x_3^i q_i$  during the direct piezoelectric simulation using Çağın's Tersoff potential parameter. for the BNNT with 8SW defects

| Atom | Boron           |               |            | Nitrogen        |               |            | $\sum x_3^i q_i$ |
|------|-----------------|---------------|------------|-----------------|---------------|------------|------------------|
|      | $x_3^{initial}$ | $x_3^{final}$ | $\Delta z$ | $x_3^{initial}$ | $x_3^{final}$ | $\Delta z$ |                  |
| 1    | 11.7863         | 12.1959       | 0.4096     | 8.60816         | 8.81874       | 0.21058    | 0.517452         |
| 2    | 16.106          | 16.7156       | 0.6096     | 12.9233         | 13.3399       | 0.4166     | 0.5018           |
| 3    | 39.8761         | 41.4568       | 1.5807     | 36.8109         | 38.1441       | 1.3332     | 0.6435           |
| 4    | 44.1178         | 45.8367       | 1.7189     | 41.0833         | 42.4955       | 1.4122     | 0.79742          |
| 5    | 48.3909         | 50.1907       | 1.7998     | 45.3246         | 46.981        | 1.6564     | 0.37284          |
| 6    | 67.8838         | 70.4544       | 2.5706     | 64.7246         | 67.0986       | 2.374      | 0.51116          |
| 7    | 76.4399         | 79.3159       | 2.876      | 73.345          | 75.9705       | 2.6255     | 0.6513           |
| 8    | 98.0026         | 101.869       | 3.8664     | 94.816          | 98.4373       | 3.6213     | 0.63726          |

Table S-9. Displacement of d-B, d-N atoms and the change of  $x_3^i q_i$  during the direct piezoelectric simulation using Çağın's Tersoff potential parameter.for the BNNT with 8SW defects

| Atom | Boron           |               |            | Nitrogen        |               |            | $\sum x_3^i q_i$ |
|------|-----------------|---------------|------------|-----------------|---------------|------------|------------------|
|      | $x_3^{initial}$ | $x_3^{final}$ | $\Delta z$ | $x_3^{initial}$ | $x_3^{final}$ | $\Delta z$ |                  |
| 1    | 65.75527        | 68.19218      | 2.436914   | 66.93684        | 69.28901      | 2.352164   | 0.220349         |
| 2    | 13.8761         | 14.41326      | 0.53716    | 15.11906        | 15.6837       | 0.564645   | -0.07146         |
| 3    | 95.80576        | 99.61016      | 3.804396   | 96.90826        | 100.7918      | 3.88352    | -0.20572         |
| 4    | 46.24381        | 48.01884      | 1.775027   | 47.35306        | 49.26803      | 1.914971   | -0.36385         |
| 5    | 37.64808        | 39.17526      | 1.527178   | 38.8316         | 40.31809      | 1.486493   | 0.105782         |
| 6    | 74.21167        | 76.99263      | 2.780959   | 75.29125        | 78.24384      | 2.952591   | -0.44624         |
| 7    | 9.548054        | 9.845723      | 0.297669   | 10.72902        | 11.09674      | 0.367726   | -0.18215         |
| 8    | 42.03587        | 43.4951       | 1.459232   | 43.07126        | 44.6679       | 1.59664    | -0.35726         |

Table S-10. Displacement of d-B, d-N atoms and the change of  $x_3^i q_i$  during the direct piezoelectric simulation using Ju's Tersoff potential parameter.for the BNNT with 8SW defects

| Atom | Boron           |               |            | Nitrogen        |               |            | $\sum x_3^i q_i$ |
|------|-----------------|---------------|------------|-----------------|---------------|------------|------------------|
|      | $x_3^{initial}$ | $x_3^{final}$ | $\Delta z$ | $x_3^{initial}$ | $x_3^{final}$ | $\Delta z$ |                  |
| 1    | 67.28398        | 69.9325       | 2.648519   | 68.67858        | 71.36705      | 2.688473   | -0.10388         |
| 2    | 14.46243        | 14.84594      | 0.383512   | 15.84841        | 16.25061      | 0.402198   | -0.04858         |
| 3    | 47.69043        | 49.45775      | 1.767324   | 49.02331        | 50.84147      | 1.818166   | -0.13219         |
| 4    | 38.75381        | 40.04653      | 1.292719   | 40.08312        | 41.41716      | 1.33404    | -0.10743         |
| 5    | 76.41395        | 79.24346      | 2.829511   | 77.71297        | 80.68227      | 2.969301   | -0.36345         |
| 6    | 87.44351        | 90.68335      | 3.239843   | 88.84189        | 92.09205      | 3.250158   | -0.02682         |
| 7    | 29.68031        | 30.96728      | 1.286971   | 31.0665         | 32.32645      | 1.259956   | 0.070238         |
| 8    | 91.55507        | 95.21174      | 3.656671   | 92.94136        | 96.56556      | 3.624202   | 0.08442          |

Table S-11. Piezoelectric constant of BNNTs determined from direct piezoelectric simulation under hollow cylinder assumption [C/m<sup>2</sup>]

| # SW defect | Cağın | Ju   | Ju-Los | Ju-Matsunaga | Los  |
|-------------|-------|------|--------|--------------|------|
| 0           | 1.64  | 0.60 | 0.56   | 0.56         | 1.00 |
| 2           | 1.61  | 0.62 | 0.57   | 0.58         | 0.99 |
| 4           | 1.67  | 0.63 | 0.59   | 0.60         | 1.00 |
| 6           | 1.65  | 0.63 | 0.59   | 0.64         | 0.99 |
| 8           | 1.63  | 0.65 | 0.60   | 0.63         | 0.99 |
| 10          | 1.61  | 0.69 | 0.59   | 0.64         | 0.98 |
| 12          | 1.53  | 0.68 | 0.61   | 0.64         | 0.95 |

Table S12. Elastic modulus of BNNTs determined from direct piezoelectric simulation under hollow cylinder assumption [GPa]

| # SW defect | Cağın | Ju  | Ju-Los | Ju-Matsunaga | Los |
|-------------|-------|-----|--------|--------------|-----|
| 0           | 738   | 946 | 940    | 945          | 802 |
| 2           | 722   | 935 | 923    | 923          | 784 |
| 4           | 716   | 922 | 915    | 913          | 778 |
| 6           | 706   | 906 | 891    | 874          | 765 |
| 8           | 695   | 901 | 871    | 872          | 761 |
| 10          | 685   | 903 | 846    | 864          | 748 |
| 12          | 676   | 894 | 850    | 837          | 729 |



Table S13. Summary of piezoelectric coefficients of BNNTs.

↑ : Increase, ↓ : Decrease, ↔ : Neutal

| Properties                      | Cağın | Ju | Ju–Los | Ju–<br>Matsunaga | Los |
|---------------------------------|-------|----|--------|------------------|-----|
| Dielectric constant             | ↑     | ↑  | ↑      | ↑                | ↑   |
| Piezoelectric constant: Reverse | ↓     | ↔  | ↓      | ↔                | ↓   |
| Piezoelectric constant: Direct  | ↓     | ↑  | ↑      | ↑                | ↓   |
| Young's modulus                 | ↓     | ↓  | ↓      | ↓                | ↓   |
